# Supplementary material for: Pathway Analysis for Genome-Wide Association Study of Basal Cell Carcinoma of the Skin
Source: PLoS One. 2011 Jul 28;6(7):e22760. doi: 10.1371/journal.pone.0022760 (PMC3145747; doi:10.1371/journal.pone.0022760)
Supplement: Table S1 — Characteristics of BCC cases and controls in this study. (XLS) [file pone.0022760.s001.xls]

## Sheet: table S1
Table S1. Characteristics of BCC cases and controls in this study
Characteristic	Case (n = 218)	Control (n = 218)
Age at blood draw (mean, years)	61.9	59.2
gender, male (%)	48.9	43.7
Natural hair color at age 20, red or blonde (%)	19	15
Tanning ability, tan or deep tan (%)	43.6	52.7
Lifetime severe sunburns, ≥ 1(%)	92.7	90
