# Supplementary material for: Pathway Analysis for Genome-Wide Association Study of Basal Cell Carcinoma of the Skin
Source: PLoS One. 2011 Jul 28;6(7):e22760. doi: 10.1371/journal.pone.0022760 (PMC3145747; doi:10.1371/journal.pone.0022760)
Supplement: Table S3 — Association results for the 174 KEGG pathways and 205 BioCarta pathways. (a) Association results for the 174 KEGG pathways; (b) Association results for the 205 BioCarta pathways. (XLS) [file pone.0022760.s003.xls]

## Sheet: tableS3(a)
Table S3(a). Association results for the 174 KEGG pathways
KEGG Pathways	Gene count1	Pathway Enrichment p Value	FDR2
Heparan sulfate biosynthesis	19	0.007	0.352
Glycan structures - biosynthesis 1	121	0.022	0.74
Chondroitin sulfate biosynthesis	22	0.028	0.785
Systemic lupus erythematosus	61	0.028	0.791
mTOR signaling pathway	49	0.043	0.875
Sphingolipid metabolism	38	0.044	0.822
Bile acid biosynthesis	33	0.04	0.895
Asthma	27	0.047	0.883
3-Chloroacrylic acid degradation	14	0.032	0.945
Glutathione metabolism	48	0.065	0.969
Neurodegenerative Diseases	40	0.098	0.977
Fatty acid metabolism	46	0.093	0.964
Androgen and estrogen metabolism	53	0.107	0.936
Keratan sulfate biosynthesis	17	0.082	0.925
Glycan structures - biosynthesis 2	63	0.11	0.901
Drug metabolism - other enzymes	50	0.11	0.863
Alzheimer's disease	28	0.13	1
Epithelial cell signaling in Helicobacter pylori infection	68	0.122	0.98
Fatty acid elongation in mitochondria	10	0.028	0.945
Dentatorubropallidoluysian atrophy (DRPLA)	15	0.153	0.97
Glycosphingolipid biosynthesis - ganglioseries	16	0.159	0.946
Selenoamino acid metabolism	31	0.138	1
Drug metabolism - cytochrome P450	70	0.166	1
Apoptosis	83	0.165	1
Glycosylphosphatidylinositol(GPI)-anchor biosynthesis	22	0.101	0.995
1- and 2-Methylnaphthalene degradation	19	0.125	0.971
Hematopoietic cell lineage	82	0.184	0.957
Oxidative phosphorylation	111	0.204	1
Huntington's disease	32	0.205	1
Metabolism of xenobiotics by cytochrome P450	68	0.221	1
Taste transduction	49	0.218	1
alpha-Linolenic acid metabolism	17	0.188	1
Porphyrin and chlorophyll metabolism	41	0.254	1
Vibrio cholerae infection	56	0.229	1
Arachidonic acid metabolism	55	0.246	1
N-Glycan degradation	15	0.171	1
Maturity onset diabetes of the young	25	0.215	1
Retinol metabolism	62	0.239	1
C21-Steroid hormone metabolism	10	0.202	1
Methionine metabolism	21	0.223	0.999
Notch signaling pathway	46	0.257	0.977
Tyrosine metabolism	58	0.269	0.971
Cell adhesion molecules (CAMs)	129	0.268	0.965
Long-term depression	76	0.255	0.962
Biosynthesis of unsaturated fatty acids	23	0.285	0.988
Circadian rhythm	14	0.269	0.969
Allograft rejection	35	0.29	0.989
Type I diabetes mellitus	41	0.279	0.97
Graft-versus-host disease	37	0.3	0.999
Pyrimidine metabolism	92	0.293	0.985
Ether lipid metabolism	33	0.303	0.981
Linoleic acid metabolism	29	0.305	1
ABC transporters	44	0.317	0.989
Nicotinate and nicotinamide metabolism	21	0.316	0.996
Protein export	10	0.321	0.98
Urea cycle and metabolism of amino groups	27	0.322	0.973
Melanogenesis	100	0.348	0.966
Fc epsilon RI signaling pathway	76	0.348	0.973
Nucleotide excision repair	42	0.331	0.966
Pentose and glucuronate interconversions	23	0.355	0.987
Starch and sucrose metabolism	75	0.359	0.98
Renal cell carcinoma	68	0.352	0.966
Benzoate degradation via CoA ligation	23	0.342	0.968
Renin-angiotensin system	17	0.39	1
Ribosome	71	0.373	0.998
DNA replication	36	0.385	1
Axon guidance	127	0.413	1
Biosynthesis of steroids	24	0.422	1
Wnt signaling pathway	147	0.42	1
Tryptophan metabolism	58	0.416	0.998
O-Glycan biosynthesis	31	0.431	0.993
ErbB signaling pathway	85	0.44	0.997
Alkaloid biosynthesis II	20	0.427	0.994
Amyotrophic lateral sclerosis (ALS)	19	0.431	0.989
Glycolysis	62	0.412	0.977
Melanoma	67	0.427	0.967
Antigen processing and presentation	79	0.413	0.959
Glycerophospholipid metabolism	70	0.429	0.957
Cysteine metabolism	13	0.49	0.969
RNA polymerase	25	0.454	0.958
N-Glycan biosynthesis	43	0.433	0.949
Aminophosphonate metabolism	17	0.53	0.955
Bladder cancer	41	0.456	0.966
Limonene and pinene degradation	24	0.465	0.968
Reductive carboxylate cycle (CO2 fixation)	11	0.582	0.969
Focal adhesion	196	0.478	0.966
Proteasome	22	0.592	0.992
PPAR signaling pathway	68	0.513	1
Citrate cycle (TCA cycle)	27	0.525	0.995
SNARE interactions in vesicular transport	36	0.51	0.988
Pantothenate and CoA biosynthesis	16	0.505	0.996
Insulin signaling pathway	136	0.531	1
Arginine and proline metabolism	35	0.543	0.995
Sulfur metabolism	12	0.551	1
Histidine metabolism	40	0.531	0.991
Non-homologous end-joining	13	0.662	0.99
Glyoxylate and dicarboxylate metabolism	15	0.581	0.995
beta-Alanine metabolism	24	0.563	0.993
Autoimmune thyroid disease	50	0.557	0.992
Mismatch repair	23	0.582	0.989
Regulation of autophagy	29	0.704	0.999
Pathogenic Escherichia coli infection	49	0.566	0.98
EPEC	49	0.566	0.98
Aminosugars metabolism	28	0.565	0.977
gamma-Hexachlorocyclohexane degradation	18	0.69	0.975
Acute myeloid leukemia	57	0.587	0.969
Parkinson's disease	20	0.598	0.976
Ubiquitin mediated proteolysis	129	0.589	0.972
Purine metabolism	148	0.594	0.966
Endometrial cancer	53	0.599	0.963
Hedgehog signaling pathway	54	0.616	0.956
Glycosphingolipid biosynthesis - lactoseries	10	0.811	0.954
Basal cell carcinoma	56	0.597	0.957
Nitrogen metabolism	24	0.662	0.953
Jak-STAT signaling pathway	153	0.613	0.958
VEGF signaling pathway	72	0.642	0.97
Complement and coagulation cascades	70	0.634	0.974
Base excision repair	33	0.66	0.976
Prion disease	16	0.692	0.983
Aminoacyl-tRNA biosynthesis	39	0.665	0.985
Chronic myeloid leukemia	75	0.661	0.982
Glioma	63	0.671	0.983
Gap junction	92	0.685	0.995
Primary immunodeficiency	34	0.698	1
Cell cycle	111	0.712	0.999
Glycan structures - degradation	29	0.705	0.994
Glycosphingolipid biosynthesis - globoseries	14	0.713	0.988
Folate biosynthesis	36	0.717	0.984
Riboflavin metabolism	16	0.778	0.98
Leukocyte transendothelial migration	114	0.71	0.975
Cell Communication	136	0.713	0.969
Propanoate metabolism	33	0.714	0.967
Phenylalanine metabolism	26	0.792	0.961
T cell receptor signaling pathway	92	0.728	0.962
Thyroid cancer	30	0.733	0.964
Streptomycin biosynthesis	10	0.778	0.958
GnRH signaling pathway	97	0.736	0.955
Colorectal cancer	85	0.749	0.96
Inositol phosphate metabolism	51	0.751	0.959
ECM-receptor interaction	87	0.766	0.971
Galactose metabolism	26	0.772	0.968
Glycosaminoglycan degradation	17	0.806	0.963
Adherens junction	75	0.771	0.959
p53 signaling pathway	67	0.768	0.962
Pancreatic cancer	72	0.784	0.972
Type II diabetes mellitus	44	0.796	0.98
TGF-beta signaling pathway	88	0.799	0.979
Tight junction	135	0.814	0.973
Glycosphingolipid biosynthesis - neo-lactoseries	22	0.869	0.983
Lysine degradation	41	0.856	0.989
Glycerolipid metabolism	50	0.845	0.995
Prostate cancer	89	0.862	0.992
Valine, leucine and isoleucine biosynthesis	12	0.947	0.999
Basal transcription factors	32	0.916	0.994
Toll-like receptor signaling pathway	101	0.877	0.995
Homologous recombination	28	0.909	0.997
Glutamate metabolism	31	0.885	0.991
Pentose phosphate pathway	26	0.931	0.986
Non-small cell lung cancer	53	0.895	0.988
Pyruvate metabolism	42	0.884	0.983
Carbon fixation	23	0.96	0.99
Alanine and aspartate metabolism	33	0.931	0.988
One carbon pool by folate	16	0.945	0.984
Glycine, serine and threonine metabolism	42	0.932	0.98
Butanoate metabolism	36	0.936	0.99
B cell receptor signaling pathway	63	0.942	0.985
Calcium signaling pathway	173	0.955	0.994
Long-term potentiation	68	0.953	0.992
Fructose and mannose metabolism	38	0.95	0.988
Phosphatidylinositol signaling system	79	0.958	0.983
Natural killer cell mediated cytotoxicity	124	0.98	0.991
Adipocytokine signaling pathway	72	0.989	0.999
Small cell lung cancer	87	0.993	0.993
Valine, leucine and isoleucine degradation	44	0.998	0.991
1 The number of the genes with SNPs tested in BCC GWAS, which are used for the enrichment in the pathways.
2 Based on 1000 permutations with 174 KEGG pathways.

## Sheet: tableS3(b)
Table S3(b). Association results for the 205 BioCarta pathways
BioCarta Pathways	Gene count1	Pathway Enrichment p Value	FDR2
mCalpainPathway	24	0.002	0.122
rhoPathway	32	0.011	0.298
no1Pathway	30	0.022	0.424
akap13Pathway	12	0.029	0.76
badPathway	25	0.084	1
akapCentrosomePathway	15	0.064	1
fasPathway	30	0.069	1
chemicalPathway	22	0.079	1
hifPathway	15	0.016	1
amiPathway	20	0.085	1
ecmPathway	23	0.076	0.952
ephA4Pathway	10	0.093	0.89
akap95Pathway	12	0.016	0.849
eifPathway	16	0.013	0.829
erkPathway	27	0.102	0.827
ck1Pathway	17	0.112	0.824
asbcellPathway	12	0.041	0.844
biopeptidesPathway	41	0.127	0.938
compPathway	19	0.139	1
p53hypoxiaPathway	21	0.109	1
p35alzheimersPathway	11	0.08	1
arapPathway	16	0.087	1
il3Pathway	14	0.076	1
integrinPathway	37	0.189	1
dreampathway	13	0.101	1
etcPathway	11	0.106	1
agpcrPathway	13	0.2	1
ceramidePathway	21	0.167	1
il2rbPathway	37	0.191	1
CSKPathway	22	0.2	1
ptc1Pathway	11	0.1	1
tcraPathway	11	0.161	1
classicPathway	14	0.185	1
rbPathway	13	0.137	1
tidPathway	19	0.188	0.982
myosinPathway	31	0.21	0.973
mitochondriaPathway	21	0.21	0.966
agrPathway	35	0.217	0.952
ndkDynaminPathway	18	0.201	0.943
ucalpainPathway	18	0.222	0.944
stathminPathway	19	0.218	0.926
shhPathway	16	0.204	0.906
SARSpathway	10	0.168	0.901
nuclearRsPathway	14	0.192	0.894
extrinsicPathway	13	0.169	0.922
il10Pathway	17	0.197	0.905
her2Pathway	21	0.282	0.976
gabaPathway	10	0.22	0.999
eponfkbPathway	11	0.235	0.982
alkPathway	37	0.268	0.992
ranMSpathway	10	0.325	1
tall1Pathway	15	0.262	1
spryPathway	17	0.274	1
caspasePathway	23	0.274	1
il17Pathway	15	0.265	1
IL12Pathway	21	0.292	1
tgfbPathway	18	0.312	1
p53Pathway	16	0.321	1
tnfr2Pathway	18	0.304	1
cdk5Pathway	10	0.303	1
epoPathway	18	0.322	1
cblPathway	13	0.351	1
gcrPathway	19	0.344	1
mcmPathway	18	0.355	1
srcRPTPPathway	11	0.36	1
intrinsicPathway	23	0.359	1
bArrestinPathway	10	0.35	1
carm1Pathway	13	0.372	1
pparaPathway	54	0.369	1
erythPathway	15	0.378	1
g2Pathway	24	0.364	1
aktPathway	22	0.352	1
DNAfragmentPathway	10	0.41	1
d4gdiPathway	13	0.382	1
tnfr1Pathway	29	0.374	1
no2il12Pathway	16	0.387	1
eif2Pathway	11	0.429	1
mta3Pathway	17	0.397	1
mTORPathway	22	0.385	1
tob1Pathway	19	0.402	1
ace2Pathway	13	0.408	0.998
lectinPathway	12	0.384	1
leptinPathway	11	0.419	1
deathPathway	33	0.402	0.997
gleevecpathway	22	0.422	0.993
rnaPathway	10	0.515	0.998
th1th2Pathway	19	0.424	1
malPathway	18	0.474	1
pitx2Pathway	15	0.497	1
plateletAppPathway	14	0.466	1
fibrinolysisPathway	12	0.459	1
il22bppathway	16	0.484	1
stressPathway	25	0.461	1
cd40Pathway	15	0.509	1
hsp27Pathway	15	0.49	1
ahspPathway	12	0.553	1
glycolysisPathway	10	0.644	1
ngfPathway	17	0.482	1
igf1mtorpathway	19	0.493	1
parkinPathway	12	0.481	1
rabPathway	12	0.639	1
HivnefPathway	58	0.464	1
mPRPathway	33	0.46	1
keratinocytePathway	45	0.463	1
CCR3Pathway	22	0.495	1
blymphocytePathway	11	0.562	1
ghPathway	27	0.513	1
rac1Pathway	23	0.515	1
hcmvPathway	16	0.539	1
vitCBPathway	11	0.534	1
ps1Pathway	14	0.573	1
tcytotoxicPathway	12	0.604	1
41bbPathway	17	0.597	1
metPathway	36	0.52	1
vegfPathway	29	0.523	1
soddPathway	10	0.767	1
mef2dPathway	18	0.568	1
salmonellaPathway	13	0.706	1
il5Pathway	10	0.584	1
nthiPathway	24	0.551	0.998
TPOPathway	23	0.535	0.996
pmlPathway	17	0.587	0.99
Par1Pathway	37	0.537	0.985
thelperPathway	12	0.649	1
egfPathway	30	0.576	0.999
RELAPathway	16	0.744	1
setPathway	10	0.776	1
cardiacegfPathway	18	0.596	1
inflamPathway	28	0.636	1
il2Pathway	21	0.615	1
igf1rPathway	22	0.649	1
gpcrPathway	33	0.61	1
freePathway	10	0.817	1
eif4Pathway	22	0.626	1
il1rPathway	33	0.604	1
crebPathway	26	0.627	1
ctlPathway	13	0.689	1
bcrPathway	33	0.647	1
vdrPathway	12	0.724	1
telPathway	18	0.636	1
sppaPathway	21	0.632	1
wntPathway	26	0.713	1
cdc42racPathway	16	0.762	1
tcrPathway	43	0.666	1
nktPathway	29	0.707	1
pdgfPathway	30	0.682	1
actinYPathway	20	0.78	1
ptdinsPathway	22	0.685	1
fcer1Pathway	37	0.697	1
mapkPathway	86	0.688	1
atrbrcaPathway	21	0.798	1
ctla4Pathway	19	0.716	1
ptenPathway	17	0.806	1
lympathway	11	0.823	1
cell2cellPathway	14	0.703	1
longevityPathway	15	0.773	1
nfatPathway	51	0.715	1
achPathway	16	0.756	1
il7Pathway	17	0.716	1
g1Pathway	28	0.757	0.996
cxcr4Pathway	23	0.723	0.992
stemPathway	15	0.903	0.988
trkaPathway	12	0.741	0.983
ranklPathway	14	0.844	0.982
nfkbPathway	23	0.824	0.979
rasPathway	22	0.811	0.977
il6Pathway	21	0.811	0.973
ctcfPathway	23	0.781	0.973
arfPathway	17	0.832	0.98
egfr_smrtePathway	11	0.76	0.981
calcineurinPathway	18	0.764	0.978
vipPathway	26	0.783	0.987
cellcyclePathway	23	0.918	0.989
atmPathway	20	0.828	0.992
tollPathway	37	0.801	0.989
dcPathway	22	0.876	0.987
monocytePathway	11	0.887	0.988
GATA3pathway	16	0.839	0.983
RacCycDPathway	25	0.882	0.982
arenrf2Pathway	12	0.837	0.981
rarrxrPathway	15	0.859	0.978
plcePathway	12	0.863	0.979
gsk3Pathway	27	0.871	0.975
nkcellsPathway	19	0.844	0.971
erk5Pathway	17	0.908	0.969
tffPathway	20	0.889	0.966
cdMacPathway	15	0.856	0.962
cytokinePathway	21	0.936	0.972
pgc1aPathway	23	0.876	0.971
LairPathway	17	0.895	0.968
CaCaMPathway	13	0.91	0.971
etsPathway	18	0.944	0.975
fMLPpathway	34	0.892	0.971
pyk2Pathway	27	0.89	0.968
igf1Pathway	20	0.95	0.964
insulinPathway	21	0.96	0.97
edg1Pathway	25	0.935	0.978
hdacPathway	29	0.938	0.976
skp2e2fPathway	10	0.876	0.991
p38mapkPathway	40	0.963	0.987
p27Pathway	13	0.907	0.991
Ccr5Pathway	17	0.99	0.995
At1rPathway	32	0.993	0.992
il4Pathway	11	0.97	0.994
granulocytesPathway	14	0.981	0.995
1 The number of the genes with SNPs tested in BCC GWAS, which are used for the enrichment in the pathways.
2 Based on 1000 permutations with 205 BioCarta pathways.
