# Supplementary material for: Pathway Analysis for Genome-Wide Association Study of Basal Cell Carcinoma of the Skin
Source: PLoS One. 2011 Jul 28;6(7):e22760. doi: 10.1371/journal.pone.0022760 (PMC3145747; doi:10.1371/journal.pone.0022760)
Supplement: Table S4 — The representative SNP information for the four pathways with significant enrichment in the BCC GWAS. (XLS) [file pone.0022760.s004.xls]

## Sheet: table S4
Table S4. The representative SNP information for the four pathways with significant enrichement in the BCC GWAS
Pathway	Genes	SNP1	PBCC2
Heparan sulfate biosynthesis pathway	HS3ST3A1	rs8074072	0.001934
	HS6ST2	rs7881124	0.002365
	HS6ST3	rs8002510	0.003428
	HS6ST1	rs11890277	0.005427
	HS3ST1	rs1024034	0.006447
	EXTL3	rs12544882	0.00974
	EXT2	rs7950395	0.009753
	NDST4	rs530485	0.01123
	HS3ST5	rs11153462	0.01289
	EXTL2	rs12239082	0.01998
	HS2ST1	rs1343393	0.02119
	HS3ST2	rs6497612	0.02134
	HS3ST3B1	rs9900779	0.04843
	GLCE	rs11072076	0.07562
	NDST1	rs7716420	0.1276
	EXT1	rs11989122	0.142
	NDST2	rs7080350	0.1449
	EXTL1	rs2997457	0.2213
	NDST3	rs6820851	0.2679
mCalpain pathway	ITGA1	rs1833556	0.0002692
	MYLK	rs820455	0.0008986
	EGF	rs6824594	0.000955
	CAPNS2	rs4784549	0.006127
	PXN	rs11611541	0.007065
	PRKACG	rs1590944	0.008306
	ITGB1	rs7079624	0.008657
	PRKACB	rs12088543	0.01132
	EGFR	rs845559	0.01397
	TLN1	rs2857802	0.01468
	MYL2	rs10849915	0.01748
	PRKAR2B	rs3735613	0.02045
	CAPNS1	rs12977802	0.04699
	CAPN2	rs3738372	0.04911
	HRAS	rs12628	0.07592
	PRKAR1A	rs2952271	0.08158
	EZR	rs3123126	0.1153
	PTK2	rs3639	0.1286
	PRKAR1B	rs4724821	0.1393
	MAPK1	rs7286558	0.145
	PRKAR2A	rs11715835	0.1696
	CAPN1	rs7116156	0.2033
	CXCR3	rs6625811	0.3486
	ACTA1	rs600171	0.5372
Rho cell motility signalling pathway	MYLK	rs820455	0.0008986
	ROCK1	rs1481280	0.0009064
	BAIAP2	rs9903763	0.00144
	OPHN1	rs5965550	0.003704
	PIP5K1B	rs963707	0.004367
	ACTR3	rs2279839	0.004835
	ARHGEF1	rs11665965	0.005401
	ARHGAP4	rs4898458	0.01023
	ARHGAP6	rs1034605	0.01355
	TLN1	rs2857802	0.01468
	MYL2	rs10849915	0.01748
	GSN	rs4837835	0.02911
	LIMK1	rs810549	0.03503
	VCL	rs10824077	0.03835
	ARPC5	rs12025732	0.03916
	ARHGAP5	rs17477697	0.04406
	ARHGEF11	rs6679776	0.05421
	SRC	rs6018088	0.06758
	ARPC1B	rs6943920	0.07111
	DIAPH1	rs370479	0.1283
	PFN1	rs2243107	0.1322
	ARPC1A	rs10237212	0.1426
	RHOA	rs6997	0.1655
	CFL1	rs665306	0.275
	PPP1R12B	rs4950779	0.3148
	ARPC4	rs293790	0.3225
	ARHGEF5	rs1635079	0.3227
	ARHGAP1	rs8914	0.3718
	ARPC2	rs6436048	0.372
	PIP5K1A	rs11204791	0.3931
	ACTR2	rs268852	0.5213
	ARPC3	rs7976889	0.7055
Nitric oxide pathway	VEGFA	rs13211073	0.0004537
	RYR2	rs2805434	0.0009352
	PRKG1	rs10762543	0.001918
	BDKRB2	rs874284	0.004726
	NOS3	rs3763486	0.007787
	CHRM1	rs4592425	0.008241
	PRKACG	rs1590944	0.008306
	TNNI1	rs6697016	0.008696
	PRKACB	rs12088543	0.01132
	KNG1	rs1656966	0.01554
	CHRNA1	rs2600685	0.01715
	CAV1	rs959173	0.0185
	SLC7A1	rs172179	0.02016
	PDE3A	rs12311494	0.02033
	PRKAR2B	rs3735613	0.02045
	HSP90AA1	rs11621560	0.04059
	PDE2A	rs3781931	0.05382
	FLT1	rs655024	0.06617
	PRKG2	rs6821258	0.07052
	CALM3	rs11083841	0.07791
	PRKAR1A	rs2952271	0.08158
	FLT4	rs11748431	0.08909
	KDR	rs11133360	0.1376
	PRKAR1B	rs4724821	0.1393
	CALM2	rs13013543	0.1556
	PDE3B	rs11023374	0.1606
	PRKAR2A	rs11715835	0.1696
	CALM1	rs12891145	0.1741
	AKT1	rs10138227	0.4716
	ACTA1	rs600171	0.5372
1 Representative SNP for each gene with the smallest PBCC.
2 p-values of the SNPs for BCC association.
